# Supplementary material for: Environmental impacts of dietary shifts in India: A modelling study using nationally-representative data
Source: PubMed Central journal article supplement (PMC6437131; doi:10.1016/j.envint.2019.02.004), 2019-05
Supplement: mmc1.pdf [file mmc1.pdf]

**Supplementary figure 1: Contribution of food groups to total dietary greenhouse gas (GHG) emissions, blue and green water footprints (WFs), and land use (LU)**

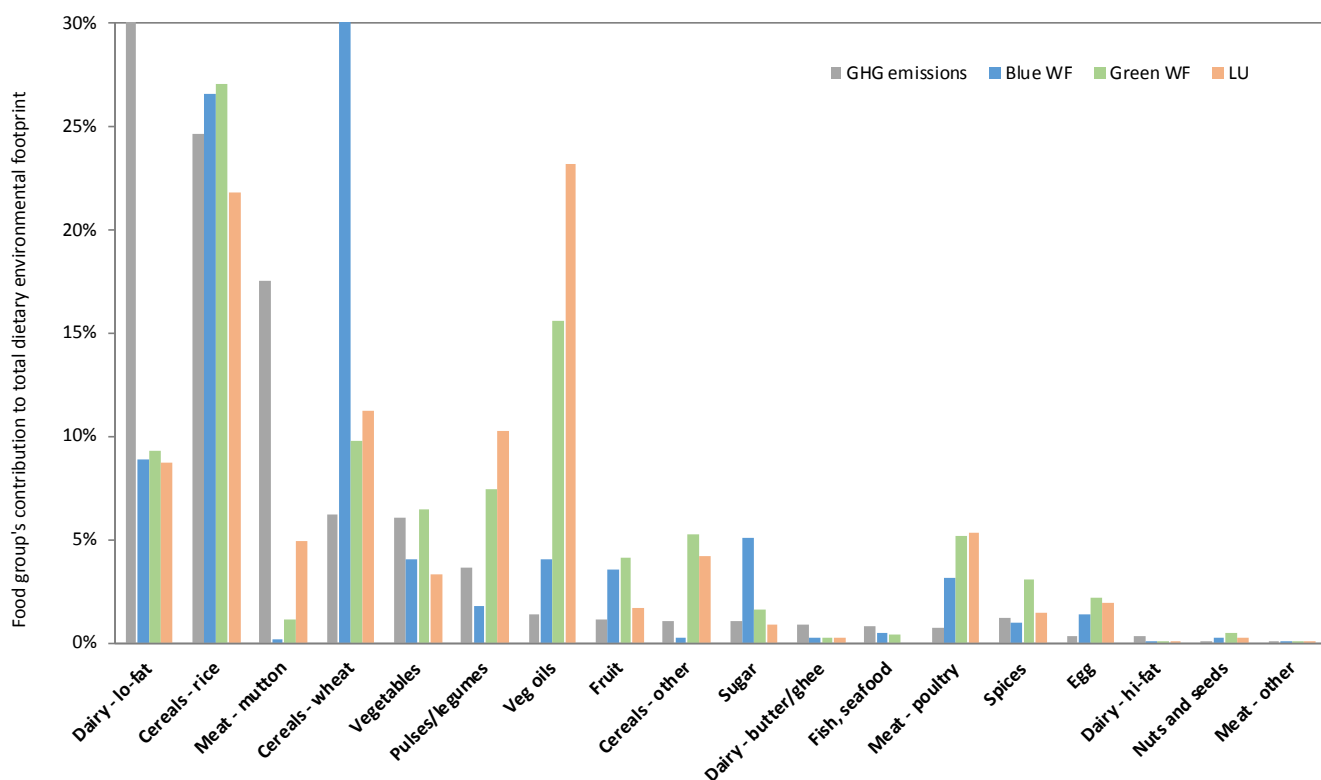

Note: GHG emissions from the dairy lo-fat category are 32%, and blue WF of the wheat category is 39%.

**Supplementary figure 2: Intake of food groups in current average diets and optimised healthy diets, nationally**

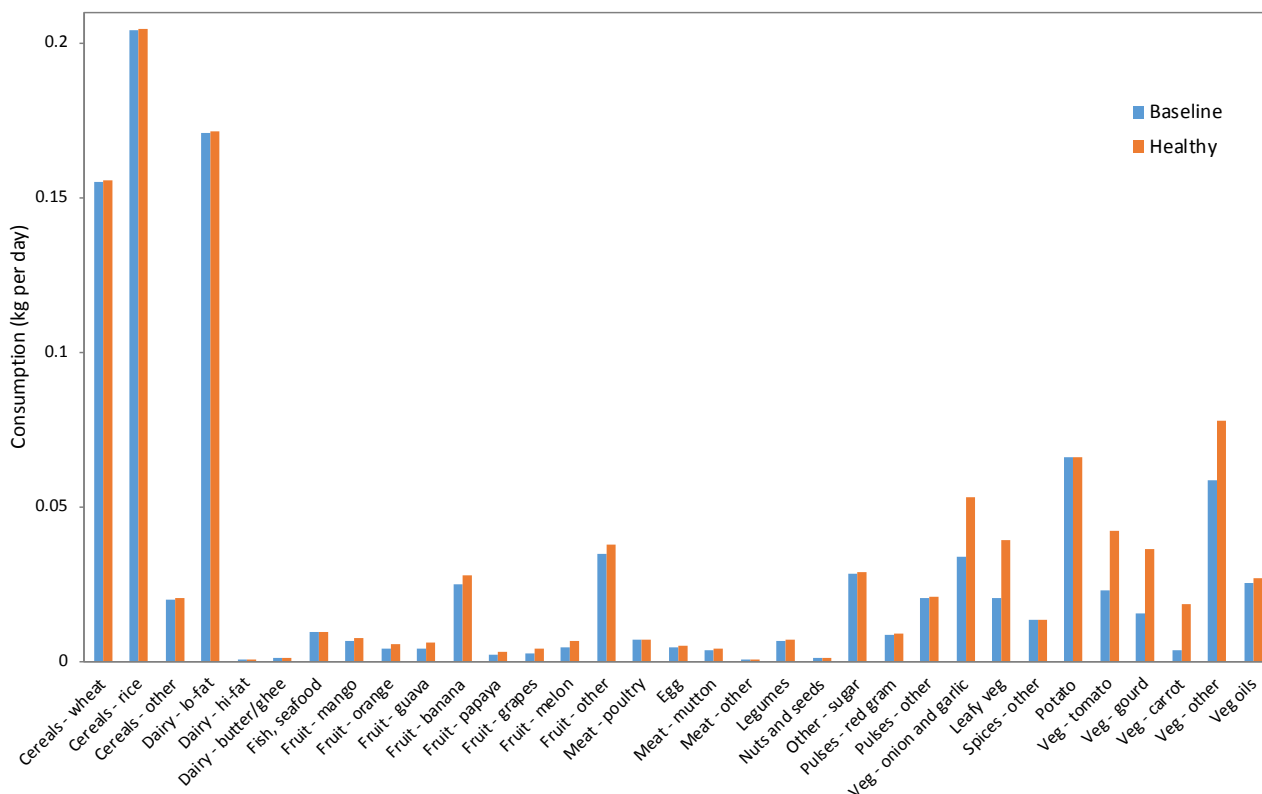

**Supplementary figure 3: Intake of food groups in current average diets and optimised healthy diets among those estimated to be below recommended dietary energy intake, nationally**

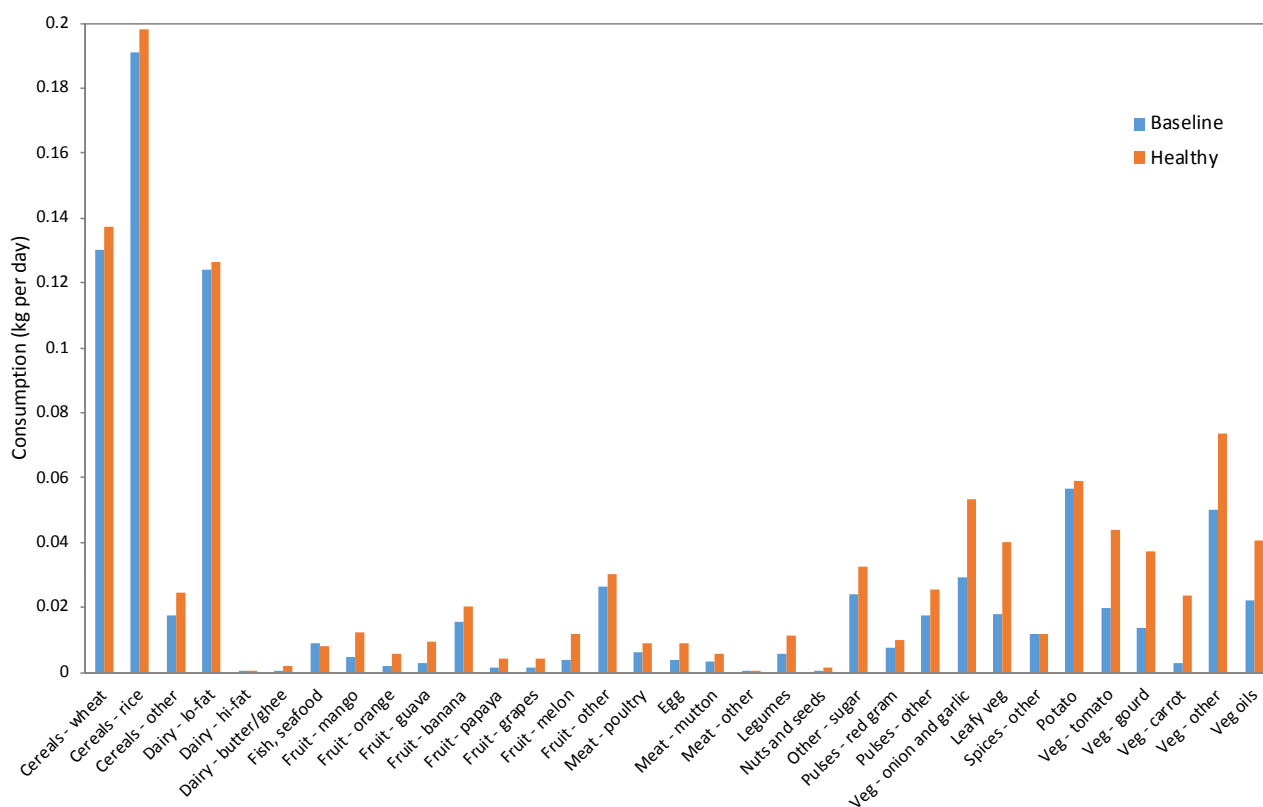

**Supplementary figure 4: Intake of food groups in current average diets and optimised healthy diets among those estimated to be above recommended dietary energy intake, nationally**

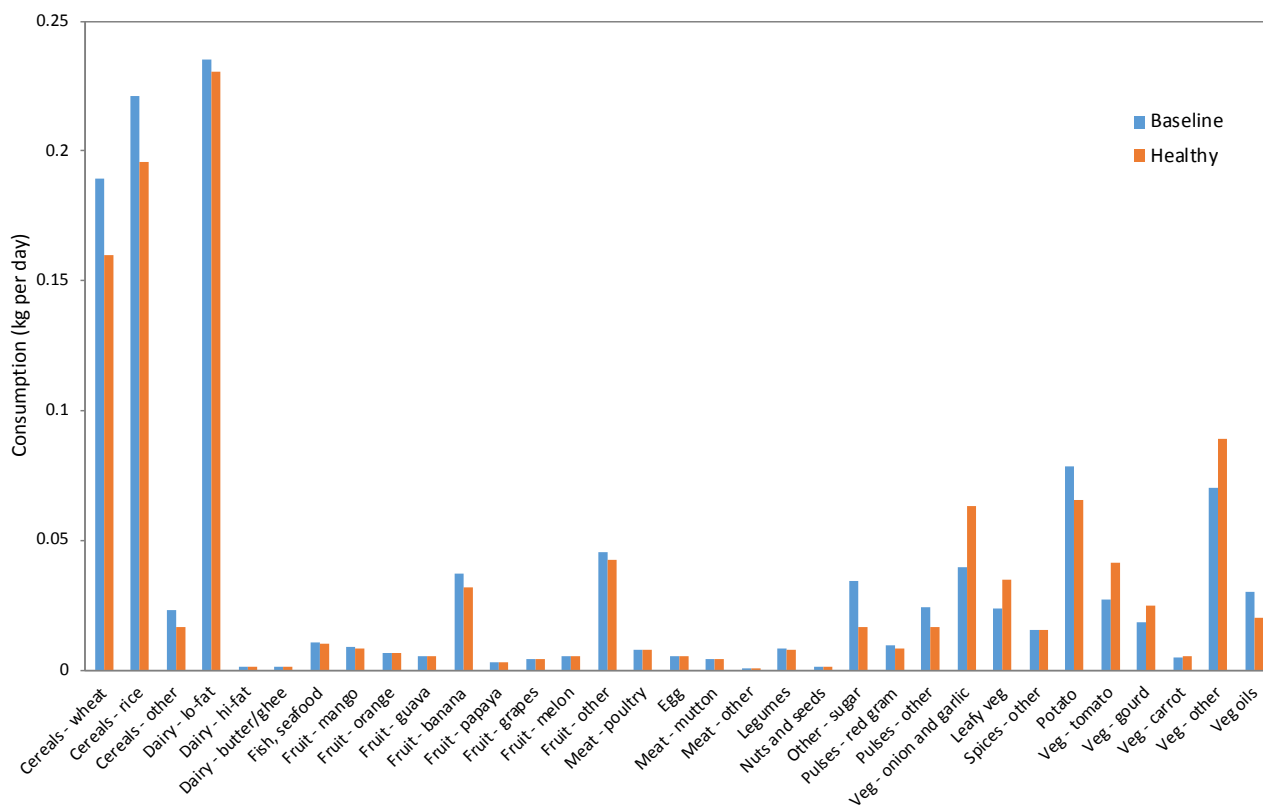

**Supplementary table 1: Allocation of individual food items to food groups**

| <b>Food group</b>   | <b>Original food item</b>       |
|---------------------|---------------------------------|
| Cereals - wheat     | wheat/atta                      |
|                     | maida                           |
|                     | suji, rawa                      |
|                     | sewai, noodles                  |
|                     | bread bakery                    |
|                     | other wheat products            |
| Cereals - rice      | rice                            |
|                     | chira                           |
|                     | khoi, lawa                      |
|                     | muri                            |
|                     | other rice products             |
| Cereals - other     | jowar & products                |
|                     | bajra & products                |
|                     | maize & products                |
|                     | barley & products               |
|                     | small millets & products        |
|                     | ragi & products                 |
|                     | other cereals                   |
| Dairy - lo-fat      | milk liquid                     |
|                     | baby food                       |
|                     | milk condensed/ powder          |
|                     | curd                            |
| Dairy - hi-fat      | ice-cream                       |
|                     | other milk products             |
| Dairy - butter/ghee | ghee                            |
|                     | butter                          |
| Fish, seafood       | fish, prawn                     |
| Fruit - mango       | mango                           |
| Fruit - orange      | orange, mausami                 |
| Fruit - guava       | guava                           |
| Fruit - banana      | banana                          |
| Fruit - papaya      | papaya                          |
| Fruit - grapes      | grapes                          |
| Fruit - melon       | watermelon                      |
|                     | kharbooza                       |
| Fruit - other       | jackfruit                       |
|                     | pineapple                       |
|                     | coconut                         |
|                     | green coconut                   |
|                     | singara                         |
|                     | pears/nashpati                  |
|                     | berries                         |
|                     | leechi                          |
|                     | apple                           |
|                     | other fresh fruits              |
|                     | lemon                           |
|                     | dates                           |
|                     | raisin, kishmish, monacca, etc. |
|                     | coconut copra                   |
|                     | other dry fruits                |
| Meat - poultry      | chicken                         |

|                        |                                           |
|------------------------|-------------------------------------------|
| Egg                    | eggs                                      |
| Meat - mutton          | goat meat/mutton                          |
|                        | beef/ buffalo meat                        |
| Meat - other           | pork                                      |
|                        | others birds, crab,oyster, tortoise, etc. |
| Legumes                | beans, barbati                            |
|                        | groundnut                                 |
| Nuts and seeds         | cashewnut                                 |
|                        | walnut                                    |
|                        | other nuts                                |
| Sugar                  | sugar                                     |
|                        | gur                                       |
|                        | candy, misri                              |
|                        | honey                                     |
| Pulses - red gram      | arhar, tur                                |
| Pulses - other         | gram split                                |
|                        | gram whole                                |
|                        | moong                                     |
|                        | masur                                     |
|                        | urd                                       |
|                        | peas                                      |
|                        | khesari                                   |
|                        | other pulses                              |
|                        | gram products                             |
|                        | besan                                     |
|                        | other pulse products                      |
| Veg - onion and garlic | onion                                     |
|                        | garlic                                    |
| Leafy veg              | palak/other leafy vegetables              |
| Spices - other         | ginger                                    |
|                        | jeera                                     |
|                        | dhania                                    |
|                        | turmeric                                  |
|                        | black pepper                              |
|                        | dry chillies                              |
|                        | tamarind                                  |
|                        | curry powder                              |
|                        | oilseeds                                  |
| other spices           |                                           |
| Potato                 | potato                                    |
| Veg - tomato           | tomato                                    |
| Veg - gourd            | parwal/patal, kundru                      |
|                        | gourd, pumpkin                            |
| Veg - carrot           | carrot                                    |
| Veg - other            | brinjal                                   |
|                        | radish                                    |
|                        | green chillies                            |
|                        | lady's finger                             |
|                        | cauliflower                               |
|                        | cabbage                                   |
|                        | peas                                      |
| other vegetables       |                                           |

|          |                                                                                           |
|----------|-------------------------------------------------------------------------------------------|
| Veg oils | edible vegetable oils (mustard, groundnut, coconut, sunflower, soyabean, saffola, others) |
|          | vanaspati, margarine                                                                      |

**Supplementary table 2: Environmental footprints of food groups**

| <b>Food group</b>      | <b>GHG emissions (kgCO<sub>2</sub>-eq/kg food)</b> | <b>Green WF (m<sup>3</sup>/kg food)</b> | <b>Blue WF (m<sup>3</sup>/kg food)</b> | <b>Land use (m<sup>2</sup>/kg food)</b> |
|------------------------|----------------------------------------------------|-----------------------------------------|----------------------------------------|-----------------------------------------|
| Cereals - wheat        | 0.540                                              | 0.985                                   | 1.366                                  | 2.867                                   |
| Cereals - rice         | 1.614                                              | 2.072                                   | 0.715                                  | 4.227                                   |
| Cereals - other        | 0.725                                              | 4.171                                   | 0.066                                  | 8.468                                   |
| Dairy - lo-fat         | 2.524                                              | 0.845                                   | 0.285                                  | 2.016                                   |
| Dairy - hi-fat         | 6.851                                              | 2.718                                   | 0.917                                  | 4.732                                   |
| Dairy - butter/ghee    | 12.531                                             | 4.321                                   | 1.458                                  | 10.268                                  |
| Fish, seafood          | 1.172                                              | 0.670                                   | 0.295                                  | -                                       |
| Fruit - mango          | 0.115                                              | 1.237                                   | 0.566                                  | 1.517                                   |
| Fruit - orange         | 0.264                                              | 0.678                                   | 0.003                                  | 1.010                                   |
| Fruit - guava          | 0.117                                              | 1.237                                   | 0.566                                  | 1.606                                   |
| Fruit - banana         | 0.195                                              | 0.266                                   | 0.193                                  | 0.338                                   |
| Fruit - papaya         | 0.117                                              | 0.267                                   | 0.087                                  | 0.278                                   |
| Fruit - grapes         | 0.586                                              | 0.289                                   | 0.336                                  | 0.510                                   |
| Fruit - melon          | 0.610                                              | 0.265                                   | 0.025                                  | 0.559                                   |
| Fruit - other          | 0.117                                              | 1.158                                   | 0.218                                  | 1.038                                   |
| Meat - poultry         | 1.425                                              | 11.782                                  | 2.530                                  | 30.631                                  |
| Egg                    | 1.119                                              | 7.721                                   | 1.658                                  | 16.987                                  |
| Meat - mutton          | 63.531                                             | 4.872                                   | 0.290                                  | 52.913                                  |
| Meat - other           | 1.425                                              | 3.324                                   | 0.272                                  | 5.162                                   |
| Legumes                | 1.759                                              | 1.606                                   | 0.129                                  | 4.869                                   |
| Nuts and seeds         | 1.286                                              | 9.410                                   | 1.525                                  | 13.358                                  |
| Other - sugar          | 0.504                                              | 0.925                                   | 0.995                                  | 1.294                                   |
| Pulses - red gram      | 1.398                                              | 5.068                                   | 0.282                                  | 18.213                                  |
| Pulses - other         | 1.261                                              | 3.114                                   | 0.323                                  | 10.814                                  |
| Veg - onion and garlic | 0.740                                              | 0.164                                   | 0.143                                  | 0.653                                   |
| Leafy veg              | 0.155                                              | 0.412                                   | 0.046                                  | 0.466                                   |
| Spices - other         | 1.254                                              | 3.626                                   | 0.424                                  | 4.521                                   |
| Potato                 | 0.497                                              | 0.218                                   | 0.038                                  | 0.565                                   |
| Veg - tomato           | 0.138                                              | 0.223                                   | 0.043                                  | 0.523                                   |
| Veg - gourd            | 0.212                                              | 0.375                                   | 0.012                                  | 1.301                                   |
| Veg - carrot           | 0.703                                              | 0.082                                   | 0.060                                  | 0.724                                   |
| Veg - other            | 0.201                                              | 1.059                                   | 0.217                                  | 0.466                                   |
| Veg oils               | 0.746                                              | 9.541                                   | 0.867                                  | 35.868                                  |

**Supplementary table 3: Daily energy, vegetable and fruit intake, according to national dietary guidelines<sup>42</sup>**

| <b>Sex</b> | <b>Age (years)</b> | <b>Energy<br/>(kcal/capita/day)</b> | <b>Vegetable<br/>intake<br/>(g/capita/day)</b> | <b>Fruit intake<br/>(g/capita/day)</b> |
|------------|--------------------|-------------------------------------|------------------------------------------------|----------------------------------------|
| Male       | <1                 | 584                                 | 55                                             | 55                                     |
|            | 1-3                | 1060                                | 100                                            | 100                                    |
|            | 4-6                | 1350                                | 150                                            | 100                                    |
|            | 7-9                | 1690                                | 200                                            | 100                                    |
|            | 10-12              | 2190                                | 300                                            | 100                                    |
|            | 13-15              | 2750                                | 300                                            | 100                                    |
|            | 16-17              | 3020                                | 300                                            | 100                                    |
|            | 18-59              | 2730                                | 300                                            | 100                                    |
|            | 60-69              | 2184                                | 240                                            | 80                                     |
|            | 70+                | 1911                                | 210                                            | 70                                     |
| Female     | <1                 | 584                                 | 55                                             | 55                                     |
|            | 1-3                | 1060                                | 100                                            | 100                                    |
|            | 4-6                | 1350                                | 150                                            | 100                                    |
|            | 7-9                | 1690                                | 200                                            | 100                                    |
|            | 10-12              | 2010                                | 300                                            | 100                                    |
|            | 13-15              | 2330                                | 300                                            | 100                                    |
|            | 16-17              | 2440                                | 300                                            | 100                                    |
|            | 18-59              | 2230                                | 300                                            | 100                                    |
|            | 60-69              | 1625                                | 240                                            | 80                                     |
|            | 70+                | 1593                                | 210                                            | 70                                     |

**Supplementary table 4: Relative changes in greenhouse gas (GHG) emissions, water footprints (WFs) and land use (LU) from shifting average Indian diets to healthy guidelines and affluent dietary scenarios**

| Region                  | GHG emissions         |                       |             |                       |             | Blue WF        |                |             |                |             | Green WF       |                |             |                |             | LU             |                |             |                |             |
|-------------------------|-----------------------|-----------------------|-------------|-----------------------|-------------|----------------|----------------|-------------|----------------|-------------|----------------|----------------|-------------|----------------|-------------|----------------|----------------|-------------|----------------|-------------|
|                         | Baseline              |                       | Healthy     |                       | Affluent    | Baseline       |                | Healthy     |                | Affluent    | Baseline       |                | Healthy     |                | Affluent    | Baseline       |                | Healthy     |                | Affluent    |
|                         | kgCO <sub>2</sub> -eq | kgCO <sub>2</sub> -eq | % diff.     | kgCO <sub>2</sub> -eq | % diff.     | m <sup>3</sup> | m <sup>3</sup> | % diff.     | m <sup>3</sup> | % diff.     | m <sup>3</sup> | m <sup>3</sup> | % diff.     | m <sup>3</sup> | % diff.     | m <sup>2</sup> | m <sup>2</sup> | % diff.     | m <sup>2</sup> | % diff.     |
| North rural ARI         | 2.1                   | 1.95                  | -6.7        |                       |             | 0.8            | 0.7            | -13.4       |                |             | 1.7            | 1.5            | -16.1       |                |             | 4.5            | 3.6            | -20.0       |                |             |
| North rural BRI         | 1.3                   | 1.5                   | 12.2        |                       |             | 0.6            | 0.6            | 11.6        |                |             | 1.2            | 1.6            | 26.7        |                |             | 3.3            | 4.2            | 28.2        |                |             |
| North rural             | 1.8                   | 1.8                   | -0.7        | 2.5                   | 38.5        | 0.7            | 0.7            | -3.1        | 0.8            | 18.1        | 1.5            | 1.4            | -8.0        | 1.9            | 22.5        | 4.0            | 3.5            | -13.5       | 4.8            | 19.8        |
| North urban ARI         | 2.0                   | 1.9                   | -5.0        |                       |             | 0.8            | 0.7            | -11.4       |                |             | 1.9            | 1.6            | -16.2       |                |             | 4.9            | 3.9            | -20.0       |                |             |
| North urban BRI         | 1.2                   | 1.4                   | 16.1        |                       |             | 0.5            | 0.6            | 14.6        |                |             | 1.3            | 1.6            | 28.7        |                |             | 3.3            | 4.4            | 31.8        |                |             |
| North urban             | 1.6                   | 1.6                   | 1.6         | 2.2                   | 40.1        | 0.6            | 0.6            | 1.0         | 0.8            | 23.2        | 1.5            | 1.6            | 1.4         | 2.1            | 34.5        | 4.0            | 4.0            | 0.7         | 5.2            | 29.3        |
| <b>North total</b>      | <b>1.7</b>            | <b>1.7</b>            | <b>-1.5</b> | <b>2.4</b>            | <b>39.1</b> | <b>0.7</b>     | <b>0.7</b>     | <b>-1.4</b> | <b>0.8</b>     | <b>20.0</b> | <b>1.5</b>     | <b>1.5</b>     | <b>-4.9</b> | <b>2.0</b>     | <b>27.2</b> | <b>4.0</b>     | <b>3.7</b>     | <b>-7.9</b> | <b>5.0</b>     | <b>23.5</b> |
| North-east rural ARI    | 1.6                   | 1.4                   | -12.6       |                       |             | 0.6            | 0.5            | -15.7       |                |             | 2.0            | 1.8            | -6.3        |                |             | 4.6            | 4.4            | -3.2        |                |             |
| North-east rural BRI    | 1.2                   | 1.4                   | 16.1        |                       |             | 0.4            | 0.5            | 20.2        |                |             | 1.4            | 1.8            | 31.6        |                |             | 3.3            | 4.6            | 39.6        |                |             |
| North-east rural        | 1.4                   | 1.4                   | -0.3        | 1.8                   | 29.4        | 0.5            | 0.5            | 5.4         | 0.5            | 18.9        | 1.6            | 1.8            | 15.6        | 2.0            | 24.5        | 3.7            | 4.5            | 19.7        | 4.7            | 27.5        |
| North-east urban ARI    | 1.7                   | 1.6                   | -8.1        |                       |             | 0.6            | 0.5            | -14.0       |                |             | 2.1            | 1.9            | -8.1        |                |             | 5.0            | 4.5            | -8.6        |                |             |
| North-east urban BRI    | 1.2                   | 1.5                   | 28.7        |                       |             | 0.4            | 0.5            | 25.5        |                |             | 1.4            | 2.0            | 39.6        |                |             | 3.4            | 5.1            | 49.6        |                |             |
| North-east urban        | 1.3                   | 1.5                   | 13.0        | 1.8                   | 34.3        | 0.5            | 0.5            | 9.7         | 0.6            | 24.6        | 1.6            | 1.9            | 15.5        | 2.1            | 27.9        | 3.9            | 4.6            | 19.5        | 5.1            | 31.2        |
| <b>North east total</b> | <b>1.4</b>            | <b>1.4</b>            | <b>3.1</b>  | <b>1.8</b>            | <b>30.1</b> | <b>0.5</b>     | <b>0.5</b>     | <b>6.4</b>  | <b>0.5</b>     | <b>19.7</b> | <b>1.6</b>     | <b>1.8</b>     | <b>15.8</b> | <b>2.0</b>     | <b>25.0</b> | <b>3.7</b>     | <b>4.5</b>     | <b>20.3</b> | <b>4.8</b>     | <b>28.0</b> |
| East rural ARI          | 1.5                   | 1.3                   | -11.3       |                       |             | 0.6            | 0.5            | -14.5       |                |             | 1.7            | 1.7            | -3.5        |                |             | 4.2            | 4.3            | 1.8         |                |             |
| East rural BRI          | 1.0                   | 1.1                   | 11.6        |                       |             | 0.5            | 0.5            | 17.7        |                |             | 1.3            | 1.7            | 30.4        |                |             | 3.1            | 4.2            | 35.7        |                |             |
| East rural              | 1.2                   | 1.2                   | 1.3         | 1.6                   | 35.0        | 0.5            | 0.5            | -1.5        | 0.6            | 14.9        | 1.5            | 1.6            | 11.2        | 1.8            | 20.6        | 3.6            | 4.1            | 13.9        | 4.5            | 25.7        |
| East urban ARI          | 1.6                   | 1.5                   | -5.8        |                       |             | 0.6            | 0.6            | -11.8       |                |             | 1.9            | 1.7            | -10.6       |                |             | 4.8            | 4.2            | -12.5       |                |             |
| East urban BRI          | 1.3                   | 1.7                   | 34.2        |                       |             | 0.5            | 0.6            | 20.9        |                |             | 1.4            | 1.9            | 38.7        |                |             | 3.5            | 5.2            | 48.3        |                |             |
| East urban              | 1.4                   | 1.5                   | 9.6         | 1.7                   | 23.3        | 0.5            | 0.6            | 6.7         | 0.6            | 18.5        | 1.5            | 1.7            | 11.9        | 2.0            | 27.3        | 4.0            | 4.5            | 14.3        | 5.0            | 25.4        |
| <b>East total</b>       | <b>1.2</b>            | <b>1.2</b>            | <b>-2.3</b> | <b>1.7</b>            | <b>32.6</b> | <b>0.5</b>     | <b>0.5</b>     | <b>1.3</b>  | <b>0.6</b>     | <b>15.6</b> | <b>1.5</b>     | <b>1.6</b>     | <b>7.6</b>  | <b>1.8</b>     | <b>21.9</b> | <b>3.7</b>     | <b>4.0</b>     | <b>8.0</b>  | <b>4.6</b>     | <b>25.6</b> |
| South rural ARI         | 1.8                   | 1.7                   | -5.5        |                       |             | 0.6            | 0.5            | -12.0       |                |             | 2.3            | 2.0            | -12.7       |                |             | 5.6            | 4.7            | -15.5       |                |             |
| South rural BRI         | 1.2                   | 1.4                   | 18.4        |                       |             | 0.4            | 0.5            | 19.6        |                |             | 1.6            | 2.1            | 31.0        |                |             | 3.9            | 5.4            | 39.6        |                |             |
| South rural             | 1.4                   | 1.6                   | 8.1         | 2.0                   | 37.8        | 0.5            | 0.5            | 6.0         | 0.6            | 21.9        | 1.9            | 2.0            | 8.0         | 2.2            | 19.8        | 4.5            | 4.9            | 9.1         | 5.5            | 22.1        |
| South urban ARI         | 2.0                   | 2.0                   | -3.9        |                       |             | 0.6            | 0.6            | -11.4       |                |             | 2.4            | 2.0            | -12.9       |                |             | 5.7            | 4.8            | -16.3       |                |             |
| South urban BRI         | 1.3                   | 1.6                   | 18.3        |                       |             | 0.4            | 0.5            | 19.2        |                |             | 1.6            | 2.1            | 30.3        |                |             | 4.0            | 5.5            | 38.2        |                |             |
| South urban             | 1.6                   | 1.7                   | 6.1         | 2.2                   | 37.9        | 0.5            | 0.5            | 7.0         | 0.6            | 25.2        | 1.9            | 2.1            | 9.4         | 2.3            | 23.4        | 4.6            | 5.1            | 9.2         | 5.7            | 22.5        |
| <b>South total</b>      | <b>1.5</b>            | <b>1.6</b>            | <b>6.4</b>  | <b>2.1</b>            | <b>37.8</b> | <b>0.5</b>     | <b>0.5</b>     | <b>5.8</b>  | <b>0.6</b>     | <b>23.2</b> | <b>1.9</b>     | <b>2.0</b>     | <b>8.2</b>  | <b>2.3</b>     | <b>21.1</b> | <b>4.5</b>     | <b>5.0</b>     | <b>9.5</b>  | <b>5.6</b>     | <b>22.2</b> |
| West rural ARI          | 1.3                   | 1.3                   | -2.6        |                       |             | 0.6            | 0.5            | -8.1        |                |             | 2.0            | 1.7            | -13.9       |                |             | 5.1            | 4.1            | -19.3       |                |             |

|                      |            |            |             |            |             |            |            |              |            |             |            |            |              |            |             |            |            |              |            |             |
|----------------------|------------|------------|-------------|------------|-------------|------------|------------|--------------|------------|-------------|------------|------------|--------------|------------|-------------|------------|------------|--------------|------------|-------------|
| West rural BRI       | 1.0        | 1.1        | 18.2        |            |             | 0.4        | 0.5        | 18.8         |            |             | 1.5        | 1.9        | 31.0         |            |             | 3.8        | 5.1        | 34.6         |            |             |
| West rural           | 1.1        | 1.2        | 7.2         | 1.5        | 32.8        | 0.5        | 0.5        | 7.2          | 0.6        | 19.7        | 1.7        | 1.8        | 10.2         | 1.9        | 16.6        | 4.3        | 4.7        | 9.5          | 5.0        | 17.7        |
| West urban ARI       | 1.8        | 1.8        | -3.0        |            |             | 0.7        | 0.6        | -8.4         |            |             | 2.1        | 1.8        | -14.0        |            |             | 5.4        | 4.4        | -19.0        |            |             |
| West urban BRI       | 1.2        | 1.7        | 43.2        |            |             | 0.5        | 0.6        | 21.0         |            |             | 1.5        | 2.0        | 33.7         |            |             | 3.9        | 5.4        | 36.5         |            |             |
| West urban           | 1.4        | 1.6        | 8.1         | 1.8        | 28.5        | 0.5        | 0.6        | 5.0          | 0.6        | 16.8        | 1.7        | 1.8        | 9.1          | 2.0        | 20.8        | 4.5        | 4.9        | 9.5          | 5.3        | 17.9        |
| <b>West total</b>    | <b>1.2</b> | <b>1.3</b> | <b>6.9</b>  | <b>1.6</b> | <b>30.6</b> | <b>0.5</b> | <b>0.5</b> | <b>5.5</b>   | <b>0.6</b> | <b>18.4</b> | <b>1.7</b> | <b>1.8</b> | <b>9.7</b>   | <b>2.0</b> | <b>18.5</b> | <b>4.4</b> | <b>4.8</b> | <b>9.9</b>   | <b>5.1</b> | <b>17.8</b> |
| Central rural ARI    | 1.4        | 1.3        | -7.5        |            |             | 0.7        | 0.6        | -12.4        |            |             | 1.6        | 1.4        | -12.9        |            |             | 4.0        | 3.4        | -15.8        |            |             |
| Central rural BRI    | 0.9        | 1.1        | 13.9        |            |             | 0.5        | 0.6        | 14.2         |            |             | 1.1        | 1.5        | 33.3         |            |             | 2.9        | 4.0        | 35.3         |            |             |
| Central rural        | 1.2        | 1.1        | -2.1        | 1.7        | 42.5        | 0.6        | 0.6        | 0.9          | 0.7        | 18.1        | 1.3        | 1.3        | 1.7          | 1.6        | 22.4        | 3.5        | 3.4        | -1.5         | 4.3        | 23.4        |
| Central urban ARI    | 1.8        | 1.7        | -4.2        |            |             | 0.7        | 0.7        | -9.9         |            |             | 1.7        | 1.4        | -14.5        |            |             | 4.5        | 3.7        | -18.9        |            |             |
| Central urban BRI    | 1.2        | 1.5        | 31.4        |            |             | 0.5        | 0.6        | 16.1         |            |             | 1.1        | 1.6        | 36.4         |            |             | 3.2        | 4.4        | 38.1         |            |             |
| Central urban        | 1.4        | 1.5        | 6.2         | 1.9        | 31.7        | 0.6        | 0.6        | 3.7          | 0.7        | 16.8        | 1.4        | 1.5        | 7.5          | 1.7        | 27.8        | 3.8        | 4.0        | 6.7          | 4.6        | 23.0        |
| <b>Central total</b> | <b>1.2</b> | <b>1.2</b> | <b>-0.2</b> | <b>1.7</b> | <b>39.7</b> | <b>0.6</b> | <b>0.6</b> | <b>1.9</b>   | <b>0.7</b> | <b>17.8</b> | <b>1.3</b> | <b>1.4</b> | <b>2.7</b>   | <b>1.7</b> | <b>23.6</b> | <b>3.5</b> | <b>3.5</b> | <b>-0.3</b>  | <b>4.3</b> | <b>23.3</b> |
| India rural ARI      | 1.6        | 1.5        | -6.5        |            |             | 0.6        | 0.6        | -13.8        |            |             | 1.8        | 1.6        | -11.4        |            |             | 4.5        | 3.9        | -13.9        |            |             |
| India rural BRI      | 1.0        | 1.4        | 31.4        |            |             | 0.5        | 0.6        | 18.7         |            |             | 1.3        | 1.8        | 34.5         |            |             | 3.3        | 4.7        | 41.3         |            |             |
| <b>India rural</b>   | <b>1.3</b> | <b>1.3</b> | <b>0.9</b>  | <b>1.8</b> | <b>37.7</b> | <b>0.5</b> | <b>0.6</b> | <b>2.5</b>   | <b>0.6</b> | <b>18.2</b> | <b>1.5</b> | <b>1.6</b> | <b>4.7</b>   | <b>1.8</b> | <b>20.7</b> | <b>3.8</b> | <b>4.0</b> | <b>3.5</b>   | <b>4.7</b> | <b>22.8</b> |
| India urban ARI      | 1.9        | 1.8        | -4.3        |            |             | 0.7        | 0.6        | -10.4        |            |             | 2.0        | 1.8        | -12.4        |            |             | 5.1        | 4.2        | -17.7        |            |             |
| India urban BRI      | 1.2        | 1.5        | 22.9        |            |             | 0.5        | 0.6        | 17.0         |            |             | 1.4        | 1.9        | 33.3         |            |             | 3.7        | 5.1        | 39.5         |            |             |
| <b>India urban</b>   | <b>1.5</b> | <b>1.6</b> | <b>6.9</b>  | <b>2.0</b> | <b>32.7</b> | <b>0.6</b> | <b>0.6</b> | <b>4.5</b>   | <b>0.7</b> | <b>20.0</b> | <b>1.6</b> | <b>1.8</b> | <b>8.7</b>   | <b>2.0</b> | <b>25.5</b> | <b>4.2</b> | <b>4.6</b> | <b>9.4</b>   | <b>5.2</b> | <b>22.8</b> |
| <b>India ARI</b>     | <b>1.6</b> | <b>1.6</b> | <b>-5.5</b> |            |             | <b>0.7</b> | <b>0.6</b> | <b>-12.8</b> |            |             | <b>1.8</b> | <b>1.6</b> | <b>-12.8</b> |            |             | <b>4.7</b> | <b>3.9</b> | <b>-15.6</b> |            |             |
| <b>India BRI</b>     | <b>1.1</b> | <b>1.4</b> | <b>27.8</b> |            |             | <b>0.5</b> | <b>0.6</b> | <b>18.4</b>  |            |             | <b>1.4</b> | <b>1.8</b> | <b>33.9</b>  |            |             | <b>3.4</b> | <b>4.8</b> | <b>40.5</b>  |            |             |
| <b>India Total</b>   | <b>1.3</b> | <b>1.4</b> | <b>4.3</b>  | <b>1.8</b> | <b>36.1</b> | <b>0.5</b> | <b>0.6</b> | <b>3.2</b>   | <b>0.7</b> | <b>18.7</b> | <b>1.6</b> | <b>1.6</b> | <b>5.1</b>   | <b>1.9</b> | <b>22.1</b> | <b>3.9</b> | <b>4.1</b> | <b>4.4</b>   | <b>4.8</b> | <b>22.8</b> |
